# Supplementary material for: Comparative Expression Profiling of Leishmania: Modulation in Gene Expression between Species and in Different Host Genetic Backgrounds
Source: PubMed Central journal article supplement (PMC2701600; doi:10.1371/journal.pntd.0000476), 2009-07-07
Supplement: pntd.0000476.s003.pdf [file pntd.0000476.s003.pdf]

**Supplementary Table 3: List of primers used in qPCR validation of microarray data**

| Gene ID                                             | Gene Annotation                         | Type                 | Used for validation of                                                                               | Primer Forward Sequence    | Primer Reverse Sequence |
|-----------------------------------------------------|-----------------------------------------|----------------------|------------------------------------------------------------------------------------------------------|----------------------------|-------------------------|
| LmjF13.0300 /<br>LinJ13_V3.0330 /<br>LbrM13_V2.0200 | Alpha tubulin                           | Control*             | <i>L.infantum</i> vs.<br><i>L.braziliensis</i>                                                       | TCTTCCTGGACCTCGAGC         | CAGCGTGGAACACCATAAAG    |
| LmjF30.3430 /<br>LinJ30_V3.3480                     | Unknown function                        | Control*             | <i>L.major</i> vs. <i>L.infantum</i>                                                                 | TGTACCCACACTCGAAGCAG       | ACAGCATCGAAACCTGATTTG   |
| LmjF32.1950 /<br>LinJ32_V3.2060                     | Unknown function                        | Control*             | <i>L.major</i> vs. <i>L.infantum</i>                                                                 | AGTGCGCACATCTGAACAAG       | CATTCACCTCGCCGTACA      |
| LbrM18_V2.1700                                      | Gamma-glutamyl<br>cysteine synthetase   | Control <sup>†</sup> | <i>L.braziliensis</i> lifecycle                                                                      | CTACGACTCTATCTCCATCTTCATCA | CACACCAGCCTTCTCCAGC     |
| LinJ29_V3.2410 /<br>LmjF29.2300                     | Ubiquitin hydrolase                     | Control <sup>‡</sup> | <i>L.major</i> and <i>L.infantum</i><br>lifecycle                                                    | TAGATGAGGTGGCACTGGTGTC     | CGTCCATCTCGATCCCCAT     |
| LmjF32.3420                                         | rRNA45                                  | Control <sup>§</sup> | <i>L.major</i> lifecycle                                                                             | CCTACCATGCCGTGTCCTTCTA     | AACGACCCCTGCAGCAATAC    |
| LmjF06.0720                                         | Unknown function                        | Target               | Balb/c vs. Rag2 <sup>-/-</sup> γ <sub>c</sub> <sup>-/-</sup>                                         | GGACCACCCTGTGTTCTTGT       | ACGTAAAGCTGGCTTGCCT     |
| LmjF35.4730                                         | Unknown function                        | Target               | Balb/c vs. Rag2 <sup>-/-</sup> γ <sub>c</sub> <sup>-/-</sup>                                         | CGCAAGAAAACAAAGGGTTC       | CTACGCAACTCTGTCCGGTGA   |
| LmjF23.1060 /<br>LinJ23_V3.1220                     | HASPB                                   | Target               | Balb/c vs. Rag2 <sup>-/-</sup> γ <sub>c</sub> <sup>-/-</sup>                                         | GACGGGGATGTGCAGAAG         | CCTTCGGCTGATCATCGT      |
| LinJ01_V3.0490 /<br>LbrM03_V2.0240                  | Fatty acyl CoA<br>synthetase 1          | Target               | <i>L.infantum</i> vs.<br><i>L.braziliensis</i>                                                       | CTCTTCAAGGGCTACTACAAGCA    | GTGCCGTAGATGCTCTCCA     |
| LinJ16_V30930 /<br>LbrM16_V2.0930                   | Flagellar calcium-<br>binding protein   | Target               | <i>L.infantum</i> vs.<br><i>L.braziliensis</i>                                                       | GATGCTGTGCTACATATACGACTA   | CACCAGCATGTTGCCGGA      |
| LmjF03.0230                                         | long chain fatty Acyl<br>CoA synthetase | Target               | <i>L.major</i> vs. <i>L.infantum</i><br>Balb/c vs. Rag2 <sup>-/-</sup> γ <sub>c</sub> <sup>-/-</sup> | CTCCAGAAGCTCAACAAGGTG      | CCAGAATCATCGCTGCCT      |
| LmjF13.0880                                         | Unknown function                        | Target               | <i>L.major</i> vs. <i>L.infantum</i>                                                                 | CGGTCCCTTTTACCTCTTCGACTA   | GCTGGAGAAGGAAGTTTTGATC  |
| LmjF29.1480                                         | Unknown function                        | Target               | <i>L.major</i> vs. <i>L.infantum</i>                                                                 | ATCAGCAGCAAGACCATCCTAT     | GCACCTCCTCCTTCTCTGG     |
| LmjF31.3000                                         | Unknown function                        | Target               | <i>L.major</i> vs. <i>L.infantum</i>                                                                 | CGGTACAACCTCCACGTCG        | TCTACTGCCATGCTGAGTGC    |
| LmjF32.1950                                         | Unknown function                        | Target               | <i>L.major</i> vs. <i>L.infantum</i>                                                                 |                            |                         |
| LmjF36.4310                                         | Unknown function                        | Target               | <i>L.major</i> vs. <i>L.infantum</i>                                                                 | TACTGCTCAGGCTATCATGGC      | ATGGTTTAAGATGTGCGAGGCC  |
| LbrM04_V2.0370                                      | ADP-ribosylation<br>factor              | Target               | <i>L.braziliensis</i> lifecycle                                                                      | GAACAACGCCGGTAAGACAT       | AGTCCCAACAGGTGAAGGTG    |

|                                 |                                          |        |                                                                                      |                       |                      |
|---------------------------------|------------------------------------------|--------|--------------------------------------------------------------------------------------|-----------------------|----------------------|
| LbrM07_V2.0360                  | ATP-dependent DEAD/H RNA helicase        | Target | <i>L. braziliensis</i> lifecycle                                                     | CTACGTGCTAGACCGCTTCC  | TAGTTCACCACCACGTCCAA |
| LbrM09_V2.0960                  | Calmodulin                               | Target | <i>L. braziliensis</i> lifecycle                                                     | GCAGATCTCCGAGTTCAAGG  | CCACCTCGTTGATCATGTCC |
| LbrM11_V2.0560                  | 40S ribosomal protein S21                | Target | <i>L. braziliensis</i> lifecycle                                                     | CTGTGCATTGCTGGCTACCT  | GGGCTTCTTCGACTTCGACT |
| LbrM12_V2.0750                  | Surface antigen protein                  | Target | <i>L. braziliensis</i> lifecycle                                                     | GGCTACCTTCCAGCTGAGTG  | TTTAAAATGGCCCAGCTGAC |
| LbrM21_V2.0360                  | Unknown function                         | Target | <i>L. braziliensis</i> lifecycle                                                     | ACGTTAAACGCGCAGAAGAT  | GTGTGTCGCAAGAGTCGAGA |
| LbrM26_V2.0120                  | Adenine phosphor-ribosyltransferase      | Target | <i>L. braziliensis</i> lifecycle                                                     | AGCTCTCTATCGACGGCTTG  | TGGAGACAGGAAGGCGTATC |
| LbrM31_V2.2570                  | 3'-nucleotidase/nucleas e                | Target | <i>L. braziliensis</i> lifecycle                                                     | GGACTATCTGCGGCTATGGA  | AATATTCGGCTACCGCCTCT |
| LbrM31_V2.3150                  | ADP-ribosylation factor                  | Target | <i>L. braziliensis</i> lifecycle                                                     | CATCTTCGTGGTCGATAGCA  | CCTGCTTGTTCCGAAATACA |
| LbrM34_V2.4130                  | Poly(a) binding protein                  | Target | <i>L. braziliensis</i> lifecycle                                                     | GAGATTGCCAAGGCTGAGTC  | CAGGTTCGGTACTTGCTGT  |
| LbrM32_V2.2500                  | Membrane associated protein              | Target | <i>L. braziliensis</i> lifecycle                                                     | TCGACGGAGTCTTCTCACCT  | GATGCATGCGATCATTTGTC |
| LbrM20_V2.0550                  | Unknown function                         | Target | <i>L. braziliensis</i> lifecycle                                                     | GTGGTGCTGAATGGACACC   | CAGATGCGCCATACCTACCT |
| LinJ08_V3.0960 / LbrM08_V2.0810 | Cathepsin L-like protease                | Target | <i>L. braziliensis</i> lifecycle<br><i>L. infantum</i> vs.<br><i>L. braziliensis</i> | GCTCGTTGGGTACAACATGAC | CCCCACGAGTTCTTGATCA  |
| LbrM09_V2.0840                  | Unknown function                         | Target | <i>L. braziliensis</i> lifecycle                                                     | ACCAACGCTCCTCAGAAAGA  | TTGTGTTGGGGTCTCGTGTA |
| LbrM18_V2.0050                  | Major facilitator superfam protein (MFS) | Target | <i>L. braziliensis</i> lifecycle                                                     | CCGTTTTTCACCAGGACTGT  | GGGCGTTCAAGCTACAAGAG |
| LmjF04.0210                     | Surface antigen protein                  | Target | Balb/c vs. Rag2 <sup>-/-</sup> γ <sub>c</sub> <sup>-/-</sup>                         | AAGTGCAAGCCCTACGATCT  | TCCTATCGCAGAGGTACGTG |
| LmjF24.0220                     | Unknown function                         | Target | Balb/c vs. Rag2 <sup>-/-</sup> γ <sub>c</sub> <sup>-/-</sup>                         | CCGTCATCGAAGACAGTGAT  | CCGTGTTCTCTAGCAGGTGA |
| LmjF24.1840                     | Lysophospholipase                        | Target | Balb/c vs. Rag2 <sup>-/-</sup> γ <sub>c</sub> <sup>-/-</sup>                         | GCGACTATGTGCGTAGCATT  | GGGATGCCATACTTCTTCGT |
| LmjF25.1820                     | Unknown function                         | Target | Balb/c vs. Rag2 <sup>-/-</sup> γ <sub>c</sub> <sup>-/-</sup>                         | CCATTTCCAGACTCGGAGGTT | TCCTCATCGAAGTCATCTGC |
| LmjF27.0745                     | Unknown function                         | Target | Balb/c vs. Rag2 <sup>-/-</sup> γ <sub>c</sub> <sup>-/-</sup>                         | GGCTACACACACGCATTGAT  | GCGCGTGACACACTTTAGG  |
| LmjF29.1000                     | Unknown function                         | Target | Balb/c vs. Rag2 <sup>-/-</sup> γ <sub>c</sub> <sup>-/-</sup>                         | GTGGGGACGGCTTTAGTAGG  | TACAAGTGCGTTGGCGATAC |

|             |                           |        |                                                              |                      |                      |
|-------------|---------------------------|--------|--------------------------------------------------------------|----------------------|----------------------|
| LmjF31.3035 | Mu-adaptin 4              | Target | Balb/c vs. Rag2 <sup>-/-</sup> γ <sub>c</sub> <sup>-/-</sup> | TGGACTTTGGTGTTGTGGAG | AGATCTCGTTCCTCGAAT   |
| LmjF32.2220 | Unknown function I        | Target | Balb/c vs. Rag2 <sup>-/-</sup> γ <sub>c</sub> <sup>-/-</sup> | TTGGTGGATGTTTCACTCGT | TGTCTGAACGGTAGCTCTGG |
| LmjF17.0080 | Elongation factor 1-alpha | Target | Balb/c vs. Rag2 <sup>-/-</sup> γ <sub>c</sub> <sup>-/-</sup> | TTCCTTCGAAGTGTGGGAC  | TAGATGACGGCGTCTGTGTC |
| LmjF22.0850 | 3'a2rel-related protein   | Target | Balb/c vs. Rag2 <sup>-/-</sup> γ <sub>c</sub> <sup>-/-</sup> | GGTGTCATCGTTGAGGAGGT | CGACCAAGACGACAACAATG |

\* Normalisation between species performed by randomly selecting genes with similar expression levels between species (i.e. fold change <0.1)

‡ Normaliser for *L.braziliensis* lifecycle (Gamboa et al., 2007), ref 35

¥ Normaliser for *L.major* and *L.infantum* lifecycles (Rochette et al., 2008), ref 14

§ Normaliser for *L.major* lifecycle (Ouakad et al., 2007), ref 48
