# Supplementary material for: Comparative Expression Profiling of Leishmania: Modulation in Gene Expression between Species and in Different Host Genetic Backgrounds
Source: PubMed Central journal article supplement (PMC2701600; doi:10.1371/journal.pntd.0000476), 2009-07-07
Supplement: pntd.0000476.s004.pdf [file pntd.0000476.s004.pdf]

### Supplementary Table 4: Genes differentially expressed between amastigotes of three *Leishmania* species

#### *L. braziliensis* vs. *L. major*

| <i>L.braz</i> GeneDB ID                                | <i>L.maj</i> GeneDB ID       | Product                                           | LogFC | P.Value | Preferential expression | Note |
|--------------------------------------------------------|------------------------------|---------------------------------------------------|-------|---------|-------------------------|------|
| LbrM04_V2.0370                                         | LmjF04.0340                  | ADP-ribosylation factor                           | -1.67 | 0.0178  | <i>L. braziliensis</i>  | NMT  |
| LbrM06_V2.0380 <sup>§</sup>                            | LmjF06.0400 <sup>§</sup>     | Fructose biphosphate aldolase                     | 1.08  | 0.0011  | <i>L. major</i>         |      |
| LbrM07_V2.0880 <sup>§</sup>                            | LmjF07.0800                  | Flavoprotein subunit protein                      | 0.78  | 0.0022  | <i>L. major</i>         |      |
| LbrM08_V2.0810 /<br>LbrM08_V2.0820 /<br>LbrM08_V2.0830 | LmjF08.1020                  | Cathepsin L-like protease                         | -1.58 | 0.0001  | <i>L. braziliensis</i>  |      |
| LbrM10_V2.0990                                         | not present in<br>geneDB     | Phosphate repressible phosphate permease          | 1.58  | 0.0001  | <i>L. major</i>         |      |
| LbrM24_V2.1790                                         | LmjF24.1730                  | Protein kinase                                    | 1.15  | 0.0016  | <i>L. major</i>         | NMT  |
| LbrM25_V2.1020                                         | not present in<br>geneDB     | Rnase III gene                                    | -1.10 | 0.0000  | <i>L. braziliensis</i>  |      |
| LbrM30_V2.0190 <sup>§</sup>                            | LmjF30.0190 <sup>§</sup>     | Polynucleotide kinase 3'-phosphatase              | -0.90 | 0.0014  | <i>L. braziliensis</i>  |      |
| LbrM30_V2.0980                                         | LmjF30.0850 /<br>LmjF30.0860 | Surface protein amastin                           | 0.81  | 0.0017  | <i>L. major</i>         |      |
| LbrM31_V2.1010 <sup>§</sup>                            | LmjF31.0830                  | Triacylglycerol lipase                            | 0.78  | 0.0003  | <i>L. major</i>         |      |
| LbrM31_V2.3150                                         | LmjF31.2790                  | ADP-ribosylation factor                           | 0.90  | 0.0118  | <i>L. major</i>         | NMT  |
| LbrM31_V2.3260                                         | LmjF31.2900                  | Nucleoporin (NUP54/57)                            | 1.34  | 0.0170  | <i>L. major</i>         | SRR  |
| LbrM35_V2.3370                                         | LmjF36.3150                  | ADP-ribosylation factor GTPase activating protein | -0.98 | 0.0016  | <i>L. braziliensis</i>  |      |
| LbrM35_V2.5630                                         | LmjF36.5370                  | Tyrosine specific protein phosphatase             | 1.50  | 0.0001  | <i>L. major</i>         |      |
| LbrM06_V2.0730                                         | LmjF06.0740                  | Unknown function                                  | -1.00 | 0.0050  | <i>L. braziliensis</i>  | SRR  |
| LbrM07_V2.0890 -<br>LbrM07_V2.0910                     | LmjF07.0840                  | Unknown function                                  | 1.41  | 0.0010  | <i>L. major</i>         | SRR  |
| LbrM16_V2.0940                                         | LmjF16.0930                  | Unknown function                                  | -1.26 | 0.0262  | <i>L. braziliensis</i>  | NMT  |

|                                    |                          |                  |       |        |                        |     |
|------------------------------------|--------------------------|------------------|-------|--------|------------------------|-----|
| LbrM20_V2.0550                     | LmjF34.0620              | Unknown function | -2.12 | 0.0058 | <i>L. braziliensis</i> | SRR |
| LbrM20_V2.0610                     | LmjF34.0680              | Unknown function | 1.24  | 0.0173 | <i>L. major</i>        | SSR |
| LbrM21_V2.0910                     | LmjF21.0820              | Unknown function | -0.92 | 0.0001 | <i>L. braziliensis</i> | SRR |
| LbrM24_V2.1520                     | LmjF24.1360              | Unknown function | 1.29  | 0.0002 | <i>L. major</i>        | NMT |
| LbrM25_V2.1380 /<br>LbrM25_V2.2450 | LmjF25.1820              | Unknown function | 0.95  | 0.0050 | <i>L. major</i>        | SRR |
| LbrM25_V2.1870                     | LmjF25.2280              | Unknown function | 0.90  | 0.0023 | <i>L. major</i>        |     |
| LbrM27_V2.2850 <sup>§</sup>        | not present in<br>geneDB | Unknown function | 0.98  | 0.0014 | <i>L. major</i>        | SRR |
| LbrM31_V2.0130                     | LmjF31.0130              | Unknown function | 0.99  | 0.0017 | <i>L. major</i>        |     |
| LbrM31_V2.0370 <sup>§</sup>        | LmjF31.0260              | Unknown function | 1.35  | 0.0105 | <i>L. major</i>        |     |
| LbrM31_V2.1560                     | LmjF31.1400              | Unknown function | 1.44  | 0.0072 | <i>L. major</i>        | NMT |
| LbrM34_V2.5330                     | LmjF35.5390              | Unknown function | -0.79 | 0.0021 | <i>L. braziliensis</i> | SRR |
| LbrM34_V2.5330                     | LmjF35.5390              | Unknown function | -0.91 | 0.0047 | <i>L. braziliensis</i> |     |

### ***L. braziliensis* vs *L. infantum***

| <b><i>L.braz</i> GeneDB ID</b>                         | <b><i>L.inf</i> GeneDB ID</b> | <b>Product</b>                           | <b>LogFC</b> | <b>P.Value</b> | <b>Preferentially expression</b> | <b>Note</b> |
|--------------------------------------------------------|-------------------------------|------------------------------------------|--------------|----------------|----------------------------------|-------------|
| LbrM04_V2.0360                                         | LinJ04_V3.0320                | Mitochondrial exoribonuclease DSS-1,     | 1.19         | 0.0177         | <i>L. infantum</i>               | SRR         |
| LbrM07_V2.0880 <sup>§</sup>                            | LinJ07_V3.0910                | Flavoprotein subunit protein             | 1.03         | 0.0003         | <i>L. infantum</i>               |             |
| LbrM07_V2.1050                                         | LinJ07_V3.1150                | RNA binding protein-like protein         | 1.61         | 0.0317         | <i>L. infantum</i>               | SRR         |
| LbrM08_V2.0810 /<br>LbrM08_V2.0820 /<br>LbrM08_V2.0830 | LinJ08_V3.0960                | Cathepsin L-like protease                | -1.49        | 0.0005         | <i>L. braziliensis</i>           |             |
| LbrM10_V2.0990                                         | LinJ20_V3.0040                | Phosphate repressible phosphate permease | 0.87         | 0.0214         | <i>L. infantum</i>               |             |
| LbrM11_V2.0080                                         | LinJ11_V3.0400                | Tubulin-tyrsoine ligase-like protein     | 1.11         | 0.0044         | <i>L. infantum</i>               | SRR         |
| LbrM12_V2.0750                                         | LinJ12_v4.0671                | Surface antigen proteins (1 and 2),      | 1.67         | 0.0000         | <i>L. infantum</i>               | SRR         |
| LbrM13_V2.1330                                         | not present in                | Amastin                                  | -1.07        | 0.0419         | <i>L. braziliensis</i>           |             |

|                                 | geneDB                          |                                                      |       |        |                        |     |
|---------------------------------|---------------------------------|------------------------------------------------------|-------|--------|------------------------|-----|
| LbrM22_V2.1590 <sup>§</sup>     | LinJ22_V3.1530                  | Phosphoinositide-specific phosphatase C              | 0.98  | 0.0020 | <i>L. infantum</i>     |     |
| LbrM23_V2.0390                  | not present in geneDB           | RNase III domain gene                                | 1.11  | 0.0001 | <i>L. infantum</i>     |     |
| LbrM25_V2.1020                  | not present in geneDB           | Rnase III gene                                       | -1.26 | 0.0000 | <i>L. braziliensis</i> |     |
| LbrM30_V2.2930 <sup>§</sup>     | LinJ30_V3.2970                  | Phospholipase c-like protein                         | -1.12 | 0.0297 | <i>L. braziliensis</i> |     |
| LbrM31_V2.1680                  | LinJ31_V3.1490                  | Surface membrane protein gp46-like protein           | 1.71  | 0.0479 | <i>L. infantum</i>     | SRR |
| LbrM31_V2.3150                  | LinJ31_V3.2890                  | ADP-ribosylation factor,                             | 0.79  | 0.0357 | <i>L. infantum</i>     | NMT |
| LbrM31_V2.3260                  | LinJ31_V3.3000                  | Nucleoporin (NUP54/57),                              | 1.46  | 0.0144 | <i>L. infantum</i>     | SRR |
| LbrM33_V2.2660                  | LinJ33_V3.2510                  | Golgi reassembly stacking protein (GRASP homologue), | 0.83  | 0.0070 | <i>L. infantum</i>     | NMT |
| LbrM34_V2.0520 / LbrM34_V2.0520 | LinJ35_V3.0510                  | Proteophosphoglycan ppg3,                            | 0.81  | 0.0005 | <i>L. infantum</i>     | SSR |
| LbrM34_V2.0520 / LbrM34_V2.0520 | LinJ35_V3.0530                  | Proteophosphoglycan ppg3,                            | 1.53  | 0.0000 | <i>L. infantum</i>     | SSR |
| LbrM34_V2.1870 <sup>§</sup>     | LinJ35_V3.1950                  | Ribosomal protein L32 like protein                   | -0.81 | 0.0049 | <i>L. braziliensis</i> |     |
| LbrM35_V2.1760                  | LinJ36_V3.1680                  | Universal minicircle sequence binding protein 1      | 0.86  | 0.0006 | <i>L. infantum</i>     | SRR |
| LbrM35_V2.3370                  | LinJ36_V3.3300                  | ADP-ribosylation factor GTPase activating protein,   | -0.79 | 0.0130 | <i>L. braziliensis</i> |     |
| LbrM05_V2.0660                  | LinJ05_V3.0670                  | Unknown function                                     | 2.46  | 0.0000 | <i>L. infantum</i>     |     |
| LbrM05_V2.0690                  | LinJ05_V3.0700                  | Unknown function                                     | 0.97  | 0.0002 | <i>L. infantum</i>     | SRR |
| LbrM06_V2.0640                  | LinJ06_V3.0660                  | Unknown function                                     | -1.44 | 0.0493 | <i>L. braziliensis</i> | SRR |
| LbrM06_V2.0710                  | LinJ06_V3.0750                  | Unknown function                                     | 1.12  | 0.0194 | <i>L. infantum</i>     | SRR |
| LbrM06_V2.0730                  | LinJ06_V3.0770                  | Unknown function                                     | -1.45 | 0.0003 | <i>L. braziliensis</i> | SRR |
| LbrM07_V2.0120                  | LinJ07_V3.0270                  | Unknown function                                     | 1.74  | 0.0358 | <i>L. infantum</i>     |     |
| LbrM07_V2.0550                  | LinJ07_V3.0540                  | Unknown function                                     | -0.87 | 0.0060 | <i>L. braziliensis</i> |     |
| LbrM07_V2.0890 - LbrM07_V2.0910 | LinJ07_V3.0950 - LinJ07_V3.0990 | Unknown function                                     | 0.93  | 0.0109 | <i>L. infantum</i>     | SRR |

|                                    |                                    |                  |       |        |                        |     |
|------------------------------------|------------------------------------|------------------|-------|--------|------------------------|-----|
| LbrM07_V2.0890 -<br>LbrM07_V2.0910 | LinJ07_V3.0950 -<br>LinJ07_V3.0990 | Unknown function | 2.21  | 0.0000 | <i>L. infantum</i>     | SRR |
| LbrM07_V2.0930                     | LinJ07_V3.1010                     | Unknown function | 0.98  | 0.0001 | <i>L. infantum</i>     | SRR |
| LbrM10_V2.1190 <sup>§</sup>        | LinJ10_V3.1170                     | Unknown function | -0.78 | 0.0470 | <i>L. braziliensis</i> |     |
| LbrM10_V2.1250                     | LinJ10_V3.1230                     | Unknown function | 2.10  | 0.0209 | <i>L. infantum</i>     | NMT |
| LbrM11_V2.0160                     | LinJ11_V3.0480                     | Unknown function | 0.80  | 0.0016 | <i>L. infantum</i>     |     |
| LbrM13_V2.0690                     | LinJ13_V3.0770                     | Unknown function | 1.82  | 0.0000 | <i>L. infantum</i>     | SRR |
| LbrM14_V2.0360                     | LinJ14_V3.0360                     | Unknown function | 1.14  | 0.0001 | <i>L. infantum</i>     |     |
| LbrM14_V2.0480                     | LinJ14_V3.0470                     | Unknown function | 0.85  | 0.0053 | <i>L. infantum</i>     |     |
| LbrM16_V2.1730                     | not present in<br>geneDB           | Unknown function | 1.42  | 0.0270 | <i>L. infantum</i>     | SRR |
| LbrM17_V2.0980                     | LinJ17_V3.0990                     | Unknown function | -0.81 | 0.0094 | <i>L. braziliensis</i> |     |
| LbrM18_V2.1250                     | LinJ18_V3.1160                     | Unknown function | 1.27  | 0.0093 | <i>L. infantum</i>     | NMT |
| LbrM20_V2.0550                     | LinJ34_V3.0640                     | Unknown function | -2.33 | 0.0045 | <i>L. braziliensis</i> | SRR |
| LbrM21_V2.0910                     | LinJ21_V3.0900                     | Unknown function | -0.95 | 0.0002 | <i>L. braziliensis</i> | SRR |
| LbrM21_V2.1080                     | LinJ21_V3.1070                     | Unknown function | -0.81 | 0.0033 | <i>L. braziliensis</i> |     |
| LbrM22_V2.1410 <sup>§</sup>        | LinJ22.1330                        | Unknown function | -1.04 | 0.0000 | <i>L. braziliensis</i> |     |
| LbrM24_V2.1380                     | LinJ24_V3.1530                     | Unknown function | 2.58  | 0.0052 | <i>L. infantum</i>     |     |
| LbrM24_V2.1520                     | LinJ24_V3.1400                     | Unknown function | 0.89  | 0.0101 | <i>L. infantum</i>     | NMT |
| LbrM25_V2.1390                     | LinJ25_V3.1910                     | Unknown function | -1.03 | 0.0003 | <i>L. braziliensis</i> | SRR |
| LbrM25_V2.1620                     | LinJ25_V3.2140                     | Unknown function | -0.97 | 0.0019 | <i>L. braziliensis</i> | NMT |
| LbrM27_V2.2850 <sup>§</sup>        | not present in<br>geneDB           | Unknown function | 1.17  | 0.0004 | <i>L. infantum</i>     | SRR |
| LbrM29_V2.0120                     | LinJ29_V3.0110                     | Unknown function | 1.27  | 0.0001 | <i>L. infantum</i>     | SRR |
| LbrM29_V2.0820                     | LinJ29_V3.0830                     | Unknown function | -0.82 | 0.0001 | <i>L. braziliensis</i> | SRR |
| LbrM29_V2.2100                     | not present in<br>geneDB           | Unknown function | -0.80 | 0.0228 | <i>L. braziliensis</i> |     |
| LbrM31_V2.0130                     | LinJ31_V3.0140                     | Unknown function | 0.86  | 0.0089 | <i>L. infantum</i>     |     |

|                             |                       |                  |       |        |                        |     |
|-----------------------------|-----------------------|------------------|-------|--------|------------------------|-----|
| LbrM31_V2.0370 <sup>§</sup> | LinJ31_V3.0280        | Unknown function | 1.14  | 0.0386 | <i>L. infantum</i>     |     |
| LbrM31_V2.1240 <sup>§</sup> | LinJ31_V3.1040        | Unknown function | -1.08 | 0.0013 | <i>L. braziliensis</i> |     |
| LbrM31_V2.1670              | LinJ31_V3.1470        | Unknown function | 2.13  | 0.0063 | <i>L. infantum</i>     | SRR |
| LbrM31_V2.2330              | LinJ31_V3.2110        | Unknown function | -1.38 | 0.0139 | <i>L. braziliensis</i> | SRR |
| LbrM32_V2.3800              | not present in geneDB | Unknown function | -0.87 | 0.0018 | <i>L. braziliensis</i> |     |
| LbrM33_V2.3200              | LinJ33_V3.3070        | Unknown function | -1.32 | 0.0001 | <i>L. braziliensis</i> | SRR |
| LbrM35_V2.1250              | LinJ36_V3.1180        | Unknown function | -0.79 | 0.0279 | <i>L. braziliensis</i> |     |

### *L. infantum* vs *L. major*

| <i>L.inf</i> GeneDB ID             | <i>L.maj</i> GeneDB ID                                         | Product                                  | LogFC | P.Value | Preferentially expressed | Note |
|------------------------------------|----------------------------------------------------------------|------------------------------------------|-------|---------|--------------------------|------|
| LinJ03_V3.0220                     | LmjF03.0230                                                    | Long chain fatty Acyl CoA synthetase,    | 2.30  | 0.0000  | <i>L. major</i>          | NMT  |
| LinJ03_V3.0570                     | LmjF03.0590                                                    | DNA repair helicase                      | -1.77 | 0.0019  | <i>L. infantum</i>       |      |
| LinJ03_V3.0720                     | LmjF03.0740                                                    | Cytochrome c oxidase copper chaperone,   | -0.94 | 0.0092  | <i>L. infantum</i>       | NMT  |
| LinJ04_V3.0320                     | LmjF04.0330                                                    | Mitochondrial exoribonuclease DSS-1,     | 1.99  | 0.0000  | <i>L. major</i>          | SRR  |
| LinJ04_V3.1180                     | LmjF04.1165 <sup>§</sup>                                       | 31-0-demethyl-FK506 methyltransferase    | -1.45 | 0.0133  | <i>L. infantum</i>       |      |
| LinJ05_V3.0480                     | LmjF05.0480                                                    | Monocarboxylate transporter-like protein | 0.78  | 0.0444  | <i>L. major</i>          |      |
| LinJ06_V3.0400 <sup>§</sup>        | LmjF06.0400 <sup>§</sup>                                       | Fructose biphosphate aldolase            | -0.81 | 0.0010  | <i>L. infantum</i>       |      |
| LinJ10_V3.0490 -<br>LinJ10_V3.0530 | LmjF10.0460 /<br>LmjF10.0465 /<br>LmjF10.0470 /<br>LmjF10.0480 | GP63, leishmanolysin                     | -1.47 | 0.0159  | <i>L. infantum</i>       | SRR  |
| LinJ11_V3.0100                     | LmjF11.0100                                                    | Seryl-tRNA synthetase,                   | -1.68 | 0.0039  | <i>L. infantum</i>       |      |
| LinJ11_V3.0400                     | LmjF11.0400                                                    | Tubulin-tyrsoine ligase-like protein     | 1.01  | 0.0003  | <i>L. major</i>          | SRR  |
| LinJ12_v4.0663                     | LmjF12.0755                                                    | Surface antigen proteins (1 and 2),      | 1.02  | 0.0000  | <i>L. major</i>          | SRR  |
| LinJ12_v4.0666                     | LmjF12.1070                                                    | Surface antigen protein 2                | 0.80  | 0.0002  | <i>L. major</i>          | SRR  |
| LinJ12_v4.0668                     | LmjF12.0780                                                    | Surface antigen protein 2 precursor      | 0.83  | 0.0000  | <i>L. major</i>          |      |

|                |                              |                                            |       |        |                    |     |
|----------------|------------------------------|--------------------------------------------|-------|--------|--------------------|-----|
| LinJ12_v4.0671 | LmjF12.1090                  | Surface antigen proteins (1 and 2),        | 1.38  | 0.0000 | <i>L. major</i>    | SRR |
| LinJ14_V3.1180 | LmjF14.1100                  | Kinesin K39,                               | -0.95 | 0.0434 | <i>L. infantum</i> | SRR |
| LinJ16_V30920  | LmjF16.0910 <sup>§</sup>     | Flagellar calcium binding protein          | -1.87 | 0.0110 | <i>L. infantum</i> |     |
| LinJ17_V3.0330 | LmjF17.0280                  | Histone H2A,                               | -1.42 | 0.0118 | <i>L. infantum</i> | SRR |
| LinJ20_V3.0970 | LmjF20.0960                  | Protein kinase,                            | 1.86  | 0.0007 | <i>L. major</i>    | SSR |
| LinJ22_V3.1530 | LmjF22.1680 <sup>§</sup>     | Phosphoinositide-specific phosphatase C    | 0.86  | 0.0002 | <i>L. major</i>    |     |
| LinJ24_V3.0630 | LmjF24.0620                  | Ubiquitin hydrolase,                       | -1.26 | 0.0433 | <i>L. infantum</i> |     |
| LinJ24_V3.1800 | LmjF24.1730                  | Protein kinase,                            | -1.15 | 0.0001 | <i>L. infantum</i> | NMT |
| LinJ27_V3.2490 | LmjF27.0510                  | Cysteine peptidase, Clan CA, family C2,    | -1.13 | 0.0374 | <i>L. infantum</i> | SRR |
| LinJ28_V3.0470 | LmjF29.0280                  | D-lactate dehydrogenase                    | -0.85 | 0.0012 | <i>L. infantum</i> |     |
| LinJ30_V3.1490 | LmjF30.1410                  | Ama1 protein,                              | 0.79  | 0.0271 | <i>L. major</i>    |     |
| LinJ30_V3.2970 | LmjF30.2950                  | Phospholipase c-like protein               | -0.88 | 0.0155 | <i>L. infantum</i> |     |
| LinJ31_V3.0860 | LmjF31.0830                  | Triacylglycerol lipase                     | -0.79 | 0.0000 | <i>L. infantum</i> |     |
| LinJ31_V3.1490 | LmjF31.1460                  | Surface membrane protein gp46-like protein | 1.18  | 0.0353 | <i>L. major</i>    | SRR |
| LinJ31_V3.2370 | LmjF31.2300                  | 3' nucleotidase/nuclease                   | -0.79 | 0.0000 | <i>L. infantum</i> |     |
| LinJ32_V3.1900 | LmjF32.1810                  | Protein kinase,                            | -1.52 | 0.0235 | <i>L. infantum</i> | NMT |
| LinJ35_V3.0260 | LmjF35.0260                  | GTP-ase activating protein,                | 0.98  | 0.0451 | <i>L. major</i>    |     |
| LinJ35_V3.0500 | LmjF35.0500                  | Proteophosphoglycan ppg3,                  | 1.09  | 0.0000 | <i>L. major</i>    | SSR |
| LinJ35_V3.0520 | LmjF35.0520 /<br>LmjF35.0540 | Proteophosphoglycan ppg3,                  | 0.84  | 0.0000 | <i>L. major</i>    | SSR |
| LinJ35_V3.0530 | LmjF35.0520 /<br>LmjF35.0540 | Proteophosphoglycan ppg3,                  | 1.24  | 0.0000 | <i>L. major</i>    | SSR |
| LinJ35_V3.0540 | LmjF35.0540                  | Proteophosphoglycan ppg3,                  | 1.73  | 0.0068 | <i>L. major</i>    |     |
| LinJ36_V3.5610 | LmjF36.5370                  | Tyrosine specific protein phosphatase      | -0.77 | 0.0036 | <i>L. infantum</i> |     |
| LinJ05_V3.0670 | LmjF05.0670                  | Unknown function                           | 2.34  | 0.0000 | <i>L. major</i>    |     |
| LinJ05_V3.0690 | LmjF05.0690                  | Unknown function                           | 1.14  | 0.0183 | <i>L. major</i>    | SRR |
| LinJ07_V3.0270 | LmjF07.0120                  | Unknown function                           | 1.55  | 0.0085 | <i>L. major</i>    |     |

|                                    |                          |                  |       |        |                    |     |
|------------------------------------|--------------------------|------------------|-------|--------|--------------------|-----|
| LinJ07_V3.0950 -<br>LinJ07_V3.0990 | LmjF07.0840              | Unknown function | 0.80  | 0.0087 | <i>L. major</i>    | SRR |
| LinJ09_V3.1640                     | LmjF09.1550              | Unknown function | -1.02 | 0.0496 | <i>L. infantum</i> | NMT |
| LinJ10_V3.0790                     | LmjF10.0740              | Unknown function | 0.77  | 0.0028 | <i>L. major</i>    |     |
| LinJ10_V3.1230                     | LmjF10.1140              | Unknown function | 2.73  | 0.0001 | <i>L. major</i>    | NMT |
| LinJ13_V3.0770                     | LmjF13.0880              | Unknown function | 1.64  | 0.0000 | <i>L. major</i>    | SRR |
| LinJ14_V3.0470                     | LmjF14.0470 <sup>§</sup> | Unknown function | 0.86  | 0.0001 | <i>L. major</i>    |     |
| LinJ15_V3.0160                     | LmjF15.0160              | Unknown function | -1.56 | 0.0169 | <i>L. infantum</i> | SRR |
| LinJ16_V3.0940                     | LmjF16.0930              | Unknown function | 1.34  | 0.0021 | <i>L. major</i>    | NMT |
| LinJ18_V3.1160                     | LmjF18.1150              | Unknown function | 0.77  | 0.0212 | <i>L. major</i>    | NMT |
| LinJ19_V3.1270                     | LmjF19.1280              | Unknown function | -1.27 | 0.0292 | <i>L. infantum</i> | NMT |
| LinJ20_V3.0530                     | LmjF20.0460              | Unknown function | -1.88 | 0.0062 | <i>L. infantum</i> |     |
| LinJ20_V3.0770                     | LmjF20.0705              | Unknown function | 1.11  | 0.0000 | <i>L. major</i>    | NMT |
| LinJ20_V3.1200 <sup>§</sup>        | LmjF20.1175 <sup>§</sup> | Unknown function | 0.80  | 0.0316 | <i>L. major</i>    |     |
| LinJ22_V3.0070                     | LmjF22.0190              | Unknown function | -0.83 | 0.0013 | <i>L. infantum</i> |     |
| LinJ23_V3.0100                     | LmjF23.0090              | Unknown function | -0.92 | 0.0447 | <i>L. infantum</i> | SRR |
| LinJ24_V3.0210                     | LmjF24.0220              | Unknown function | -1.68 | 0.0078 | <i>L. infantum</i> |     |
| LinJ24_V3.1530                     | LmjF24.1470              | Unknown function | 2.70  | 0.0001 | <i>L. major</i>    |     |
| LinJ25_V3.1150                     | LmjF25.1110              | Unknown function | -2.63 | 0.0000 | <i>L. infantum</i> | SRR |
| LinJ26_V3.0390                     | LmjF26.0400              | Unknown function | -1.46 | 0.0049 | <i>L. infantum</i> |     |
| LinJ26_V3.1420                     | LmjF26.1440              | Unknown function | -1.97 | 0.0057 | <i>L. infantum</i> | NMT |
| LinJ29_V3.0110                     | LmjF29.0110              | Unknown function | 0.95  | 0.0000 | <i>L. major</i>    | SRR |
| LinJ29_V3.0870                     | LmjF29.0830              | Unknown function | 1.48  | 0.0013 | <i>L. major</i>    | SRR |
| LinJ31_V3.1090                     | LmjF31.1090              | Unknown function | -1.80 | 0.0005 | <i>L. infantum</i> |     |
| LinJ31_V3.1430                     | LmjF31.1400              | Unknown function | -0.80 | 0.0385 | <i>L. infantum</i> | NMT |
| LinJ31_V3.1470                     | LmjF31.1440              | Unknown function | 1.05  | 0.0000 | <i>L. major</i>    | SRR |
| LinJ31_V3.1470                     | LmjF31.1440              | Unknown function | 1.26  | 0.0000 | <i>L. major</i>    | SRR |

|                |                          |                  |       |        |                    |     |
|----------------|--------------------------|------------------|-------|--------|--------------------|-----|
| LinJ31_V3.1470 | LmjF31.1440              | Unknown function | 2.52  | 0.0000 | <i>L. major</i>    | SRR |
| LinJ31_V3.2550 | not present in<br>geneDB | Unknown function | -0.99 | 0.0067 | <i>L. infantum</i> |     |
| LinJ31_V3.2750 | LmjF31.2670              | Unknown function | -1.77 | 0.0167 | <i>L. infantum</i> | SRR |
| LinJ31_V3.3110 | LmjF31.3000              | Unknown function | -1.35 | 0.0098 | <i>L. infantum</i> |     |
| LinJ32_V3.0220 | LmjF32.0210              | Unknown function | -1.43 | 0.0263 | <i>L. infantum</i> | SRR |
| LinJ33_V3.2120 | LmjF33.2000              | Unknown function | 0.82  | 0.0277 | <i>L. major</i>    | SRR |
| LinJ33_V3.3070 | LmjF33.2910              | Unknown function | -0.84 | 0.0002 | <i>L. infantum</i> | SRR |
| LinJ34_V3.0740 | LmjF34.0705              | Unknown function | -1.08 | 0.0435 | <i>L. infantum</i> |     |
| LinJ36_V3.4360 | LmjF36.4150              | Unknown function | -2.30 | 0.0002 | <i>L. infantum</i> |     |
| LinJ36_V3.4520 | LmjF36.4310              | Unknown function | -1.70 | 0.0065 | <i>L. infantum</i> |     |

§annotated as a pseudogene in GeneDB

Note: NMT, N-myristoyl transferase target genes; SRR, sequence repeat region (see Depledge et al 2007, ref 22)
