# Supplementary material for: Comparative Expression Profiling of Leishmania: Modulation in Gene Expression between Species and in Different Host Genetic Backgrounds
Source: PLoS Negl Trop Dis. 2009 Jul 7;3(7):e476. doi: 10.1371/journal.pntd.0000476 (PMC2701600; doi:10.1371/journal.pntd.0000476)
Supplement: Table S1 — List of genes differentially distributed between three Leishmania species with microarray analysis derived from this study or ref [14]. (0.06 MB XLS) [file pntd.0000476.s001.xls]

## Sheet: GeneList
Table S1: List of genes differentially distributed between three Leishmania species with microarray analysis derived from this study or ref 14
Differentially Distributed Gene List				L.braziliensis arrays¬			L.major array*			L.infantum array*
Product	L. major	L. infantum	L. braziliensis	LogFC	P.Value	Up in	Fold increase	p-value	Up in	Fold increase	p-value	Up in
SLACS	absent (no trace)	absent (no trace)	LbrM02_V2.0550
SLACS	absent (no trace)	absent (no trace)	LbrM02_V2.0690
SLACS	absent (no trace)	absent (no trace)	LbrM02_V2.0720
Hypothetical repeat protein*	absent (no trace)	absent (no trace)	LbrM03_V2.0960
Hypothetical protein	absent (no trace)	absent (no trace)	LbrM05_V2.0960
Hypothetical protein	absent (no trace)	absent (no trace)	LbrM11_V2.1100
Hypothetical protein	absent (no trace)	absent (no trace)	LbrM13_V2.1570
Hypothetical protein repeat	absent (no trace)	absent (no trace)	LbrM14_V2.0940
SLACS	absent (no trace)	absent (no trace)	LbrM16_V2.0470
Beta galactofuranosyle transferase	absent (no trace)	absent (no trace)	LbrM20_V2.0480
Hypothetical protein	absent (no trace)	absent (no trace)	LbrM22_V2.0810
RNase III domain gene	absent (no trace)	absent (no trace)	LbrM23_V2.0390
Hypothetical protein	absent (no trace)	absent (no trace)	LbrM23_V2.0550
Hypothetical protein	absent (no trace)	absent (no trace)	LbrM23_V2.1110	NOT ON ARRAY
Hypothetical protein	absent (no trace)	absent (no trace)	LbrM23_V2.1120
Hypothetical protein	absent (no trace)	absent (no trace)	LbrM24_V2.1430
Rnase III gene	absent (no trace)	absent (no trace)	LbrM25_V2.1020
Hypothetical protein	absent (no trace)	absent (no trace)	LbrM26_V2.0010
Hypothetical protein	absent (no trace)	absent (no trace)	LbrM27_V2.2790
Hypothetical protein	absent (no trace)	absent (no trace)	LbrM28_V2.0580
Hypothetical protein	absent (no trace)	absent (no trace)	LbrM28_V2.1240
Hypothetical protein	absent (no trace)	absent (no trace)	LbrM30_V2.2580
Hypothetical protein	absent (no trace)	absent (no trace)	LbrM31_V2.2370
Hypothetical protein	absent (no trace)	absent (no trace)	LbrM32_V2.0080
Hypothetical protein	absent (no trace)	absent (no trace)	LbrM32_V2.3800
Hypothetical protein	absent (no trace)	absent (no trace)	LbrM34_V2.2010
Amino acid transporter	absent (no trace)	absent (no trace)	LbrM35_V2.1500
cyclopropane-fatty-acyl-phospholipid synthase, putative	absent (no trace)	LinJ08_V3.0560	LbrM08_V2.0590
Hypothetical protein repeat	absent (no trace)	LinJ22_V3.0300	absent (no trace)
Hypothetical protein	absent (no trace)	LinJ23_V3.1010	LbrM23_V2.0930
Multidrug resistance protein	absent (no trace)	LinJ24_V3.1510	LbrM24_V2.1400
phosphatidylinositol/phosphatidylcholin/sec14 cytosolic factor	absent (no trace)	LinJ36_V3.0640	LbrM35_V2.0690
Hypothetical protein	absent (no trace)	LinJ36_V3.4190	degenerate
Hypothetical protein	degenerate	degenerate	LbrM06_V2.1180
Hypothetical protein	degenerate	degenerate	LbrM11_V2.1130
Hypothetical protein	degenerate	degenerate	LbrM21_V2.0880
Hypothetical protein	degenerate	degenerate	LbrM22_V2.0105
Hypothetical protein	degenerate	degenerate	LbrM22_V2.1380
Adenine phosphoribosyltransferase	degenerate	degenerate	LbrM26_V2.0120	0.836807	0.00497038	Pro
Glutathione peroxidase	degenerate	degenerate	LbrM26_V2.0810
Hypothetical protein	degenerate	degenerate	LbrM28_V2.0980
Hypothetical protein	degenerate	degenerate	LbrM29_V2.0740
Hypothetical protein	degenerate	degenerate	LbrM29_V2.2060
Clathrin assembly sigma-adaptin	degenerate	degenerate	LbrM32_V2.0150
Hypothetical protein	degenerate	degenerate	LbrM33_V2.3180
Hypothetical protein	degenerate	degenerate	LbrM33_V2.3490
galactokinase	degenerate	degenerate	LbrM34_V2.3650
Hypothetical protein	degenerate	LinJ02_V3.0720	absent (no trace)
Hypothetical protein	degenerate	LinJ07_V3.0310	LbrM07_V2.0150
Hypothetical protein	degenerate	LinJ10_V3.1170	LbrM10_V2.1190
Hypothetical protein	degenerate	LinJ15.1280	LbrM15_V2.1300
Phosphate repressible phosphate permease	degenerate	LinJ20_V3.0040	LbrM10_V2.0990
CMP-sialic acid transporter	degenerate	LinJ20_V3.1070	degenerate	NOT ON ARRAY
Hypothetical protein	degenerate	LinJ22_V3.0670	degenerate							5.60773	3.36e-08	Li ama
p-nitrophenylphosphatase	degenerate	LinJ31_V3.2420	degenerate
Hypothetical protein	degenerate	LinJ31_V3.2550	degenerate (dan)
Hypothetical protein	degenerate	LinJ32_V3.1580	LbrM32_V2.1680
Hypothetical protein	LmjF01.0730	LinJ01.0740	degenerate
Protein kinase	LmjF01.0750	LinJ01.0760	LbrM01_V2.0720
Tagatose-6-phosphate kinase	LmjF02.0030	LinJ25_V3.2550	LbrM02_V2.0030
Aminopeptidase P1	LmjF02.0040	LinJ02.0010	LbrM02_V2.0060
Hypothetical protein	LmjF02.0100	LinJ02_V3.0080	LbrM02_V2.0110
Zinc binding dehydrogenase	LmjF03.0290	LinJ03_V3.0280	absent (no trace)
Hypothetical protein	LmjF04.0350	LinJ04_V3.0340	LinJ04_V3.0340
Hypothetical protein	LmjF04.0430	LinJ04_V3.0410	LbrM04_V2.0470
Hypothetical protein	LmjF04.0465	LinJ04_V3.0450	LbrM04_V2.0510
Hypothetical protein	LmjF04.0540	LinJ04_V3.0530	LbrM04_V2.0590
Hypothetical protein	LmjF04.0600	LinJ04_V3.0590	LbrM04_V2.0690
Hypothetical protein	LmjF04.0900	LinJ04_V3.0900	degenerate
31-0-demethyl-FK506 methyltransferase	LmjF04.1165	LinJ04_V3.1180	LbrM04_V2.1180
Viscerotropic gene	LmjF05.0240	LinJ05_V3.0240	degenerate
Pteridine transporter	LmjF06.0310	LinJ06_V3.0310	LbrM06_V2.0290				3.21012	2.34156e-06	Lm pro
Fructose biphosphate aldolase	LmjF06.0400	LinJ06.0400	LbrM06_V2.0380
Hypothetical protein	LmjF06.0630	LinJ06_V3.0650	absent (no trace)
Hypothetical protein*	LmjF07.0745	LinJ06_V3.0400	degenerate
Flavoprotein subunit protein	LmjF07.0800	LinJ07_V3.0910	LbrM07_V2.0880				1.76951	0.0036069	Lm pro
Hypothetical protein	LmjF07.0910	LinJ07_V3.1040	degenerate
ATPase subunit 9	LmjF07.1105	LinJ07_V3.1280	LbrM07_V2.1180							2.12241	0.000418514	Li ama
Hypothetical protein	LmjF08.0135	LinJ08_V3.0140	degenerate
Tuzin	LmjF08.0795	LinJ08.0750	LbrM08_V2.0690
Hypothetical protein	LmjF10.0185	LinJ10.0475	degenerate				1.96681	0.000123395	Lm pro
Pteridiine transporter ft5	LmjF10.0350	LinJ10_V3.0360	LbrM10_V2.0370
Hypothetical protein	LmjF10.0425	LinJ10_V3.0440	LbrM10_V2.0430
Hypothetical protein	LmjF10.0930	LinJ10_V3.1000	LbrM10_V2.0930	NOT ON ARRAY
Hypothetical protein*	LmjF10.1225	LinJ10_V3.1340	LbrM10_V2.1350
Hypothetical protein*	LmjF11.0280	LinJ11_V3.0280	LbrM19_V2.0040
Hypothetical protein*	LmjF11.0475	LinJ11_V3.0480	LbrM11_V2.0160
Argonaute	LmjF11.0570	LinJ11_V3.0500	LbrM11_V2.0360
Hypothetical protein	LmjF12.0160	LinJ12_V3.0140	absent (no trace)
Hypothetical protein	LmjF13.1390	LinJ13_V3.1290	LbrM13_V2.1160
EF hand protein	LmjF13.1450	LinJ13_V3.1490	LbrM13_V2.1220							1.90285	0.00349519	Li ama
Phosphatidylinositol 3-kinase	LmjF14.0020	LinJ14_V3.0020	LbrM14_V2.0020
carboxypeptidase	LmjF14.0180	LinJ14_V3.0180	LbrM14_V2.0180
Hypothetical protein	LmjF14.0270	LinJ14_V3.0270	LbrM14_V2.0270							3.48723	5.45305e-07	Li ama
Hypothetical protein*	LmjF14.0470	LinJ14_V3.0470	LbrM14_V2.0480
Fatty acid elongase*	LmjF14.0665	LinJ14_V3.0690	LbrM14_V2.0640
Fatty acid elongase	LmjF14.0700	LinJ14_V3.0750	LbrM14_V2.0680
Guanine nucleotide-binding protein*	LmjF14.0760	LinJ14_V3.0820	LbrM14_V2.0740
Kinesin	LmjF14.0810	LinJ14_V3.0870	LbrM14_V2.0785				1.84965	1.37031e-05	Lm pro
Hypothetical protein	LmjF14.0870	LinJ14_V3.0930	LbrM14_V2.0840
Hypothetical protein	LmjF14.1095	LinJ14_V3.1170	LbrM14_V2.1090
Pteridine transporter*	LmjF14.1355	LinJ14_V3.1440	LbrM14_V2.1530
Hypothetical protein	LmjF15.0595	LinJ15_V3.0620	LbrM15_V2.0630							7.14878	1.2775e-10	Li ama
Hypothetical protein*	LmjF15.0840	LinJ15_V3.0900	absent (no trace)
Hypothetical protein*	LmjF16.0880	LinJ16_V30880	degenerate
Flagellar calcium binding protein	LmjF16.0910	LinJ16_V30920	LbrM16_V2.0920
Flagellar calcium binding protein	LmjF16.0920	LinJ16_V30930	LbrM16_V2.0930
Hypothetical protein	LmjF16.1385	LinJ16_V31460	LbrM16_V2.1440
Hypothetical protein	LmjF16.1640	LinJ16_V31740	LbrM16_V2.1700
Transporter (sugar)	LmjF18.0040	LinJ18_V3.0040	LbrM18_V2.0050
Hypothetical protein	LmjF18.1650	LinJ18_V3.1650	LbrM18_V2.1690
Glycerol uptake protein	LmjF19.1347	LinJ19_V3.1370	LbrM19_V2.1570
Hypothetical protein	LmjF20.0355	LinJ20_V3.0410	absent (no trace)
Hypothetical protein	LmjF20.0460	LinJ20_V3.0530	degenerate
endo-1,4-beta-xylanase z precursor-like protein	LmjF20.1170	LinJ20_V3.1190	absent (no trace)	NOT ON ARRAY
Hypothetical protein	LmjF20.1175	LinJ20_V3.1200	degenerate
Hypothetical protein	LmjF20.1470	LinJ20_V3.1520	absent (no trace)
Zinc binding phosphatase	LmjF20.1480	LinJ20_V3.1530	absent (no trace)
Hypothetical protein	LmjF21.0450	LinJ21_V3.0510	LbrM20_V2.0510
Hypothetical protein	LmjF21.0891	LinJ21_V3.1110	degenerate
Hypothetical protein	LmjF21.1230	LinJ21_V3.1470	LbrM21_V2.1430
Hypothetical protein	LmjF21.1570	LinJ21_V3.1920	LbrM21_V2.1800
Hypothetical protein	LmjF22.0130	absent (no trace)	LbrM22_V2.0130
Hypothetical protein	LmjF22.0150	LinJ22_V3.0030	LbrM25_V2.0540
Hypothetical protein	LmjF22.0190	LinJ22_V3.0070	LbrM22_V2.0190				1.73699	2.09934e-05	Lm pro
Hypothetical protein	LmjF22.0250	LinJ22_V3.0120	LbrM22_V2.0240
Methylenetetrahydrofolate *dehydrogenase	LmjF22.0340	LinJ22_V3.0220	absent (no trace)
Hypothetical protein	LmjF22.1510	LinJ22.1330	LbrM22_V2.1410	0.861791	0.0397621	Pro
phosphoinositide-specific phosphatase C	LmjF22.1680	LinJ22_V3.1530	LbrM22_V2.1590
Argininosuccinate synthase	LmjF23.0260	LinJ23.0300	LbrM23_V2.0290
Hypothetical protein	LmjF23.0400	LinJ23.0440	LbrM23_V2.0440
Oxoreductase	LmjF23.0670	LinJ23.0810	LbrM23_V2.0770
Hypothetical protein	LmjF23.0790	LinJ23.0930	degenerate
Hypothetical protein	LmjF23.0845	LinJ23_V3.1030	LbrM23_V2.0950
HASPA	LmjF23.1040,1082,1088	LinJ23.1160, 1200	absent (no trace)				2.44637	1.35772e-06	Lm ama
SHERP	LmjF23.1050, 1080, 1086	LinJ23.1170, 1190	absent (no trace)				1.70391	5.0093e-06	Lm pro	2.50426	1.88856e-06	Li ama
HASPB	LmjF23.1060, 1070	LinJ23.1180	absent (no trace)							2.3903	6.4326e-05	Li ama
Transcription elongation factor	LmjF24.0200	LinJ24_V3.0190	LbrM24_V2.0190							2.84835	6.47106e-06	Li ama
Hypothetical protein	LmjF24.0220	LinJ24_V3.0210	LbrM24_V2.0210
Multi-pass transmembrane protein	LmjF24.0700	LinJ24_V3.0710	LbrM24_V2.0710
lysophospholipase	LmjF24.1840	LinJ24_V3.1910	LbrM24_V2.1910
Hypothetical protein (Opiate Growth Factor)	LmjF24.2045	LinJ24_V3.2130	degenerate
Glutathioneylspermidine synthase	LmjF25.2380	LinJ25_V3.2500	LbrM25_V2.1980
Hypothetical protein	LmjF26.0520	LinJ26_V3.0500	LbrM26_V2.0530
Hypothetical protein	LmjF26.0990	LinJ26_V3.0960	LbrM26_V2.1000
Hypothetical protein	LmjF27.0020	LinJ27_V3.0020	LbrM27_V2.0030
Hypothetical protein	LmjF27.0745	LinJ27_V3.0600	LbrM27_V2.0830
Hypothetical protein	LmjF27.0870	LinJ27_V3.0720	LbrM27_V2.0940				1.71258	3.04975e-05	Lm pro	1.9286	1.56281e-06	Li pro
Hypothetical protein	LmjF27.0875	LinJ27_V3.0730	LbrM27_V2.0950
Hypothetical protein	LmjF27.0960	LinJ27_V3.0820	LbrM27_V2.1040
Hypothetical protein	LmjF27.1125	LinJ27_V3.1010	LbrM27_V2.1220
carboxypeptidase	LmjF27.1245	LinJ27_V3.1130	LbrM27_V2.1350	0.993294	0.01724	Pro
Hypothetical protein	LmjF27.1470	LinJ27_V3.1380	LbrM27_V2.1610				1.86064	6.71686e-06	Lm pro
eukaryotic translation release factor	LmjF27.1710	LinJ27_V3.1610	LbrM27_V2.1850
Phosphoglycerate kinase	LmjF27.1720	LinJ27_V3.1620	absent (no trace)
Hypothetical protein	LmjF27.1740	LinJ27.1245	absent (no trace)
Hypothetical protein	LmjF27.1770	LinJ27_V3.1670	LbrM27_V2.1890
Dynein heavy chain	LmjF27.2590	LinJ27_V3.2460	LbrM27_V2.2710				2.01027	7.82053e-06	Lm pro	2.08129	4.12564e-05	Li pro
Adenylate cyclase like protein	LmjF28.0090	LinJ28_V3.0080	LbrM28_V2.0100				1.68956	0.00297405	Lm pro
Hypothetical protein	LmjF28.0150	LinJ28_V3.0150	LbrM28_V2.0160				1.69926	1.70836e-05	Lm ama
Hypothetical protein	LmjF28.0420	LinJ28_V3.0340	LbrM28_V2.0430
Hypothetical protein	LmjF28.0430	LinJ28_V3.0330	LbrM28_V2.0440
Hypothetical protein	LmjF28.0840	LinJ28_V3.0930	LbrM28_V2.0910
Hypothetical protein	LmjF28.1165	LinJ28_V3.1270	LbrM28_V2.1260
Hypothetical protein	LmjF28.2450	LinJ28_V3.2640	LbrM28_V2.2660
Hypothetical protein	LmjF28.2965	LinJ28_V3.3200	LbrM28_V2.3180
D-lactate dehydrogenase	LmjF29.0280	LinJ28_V3.0470	LbrM29_V2.0540				2.97722	3.97417e-09	Lm pro
Lipase*	LmjF29.1260	LinJ29_V3.1350	LbrM29_V2.1340
Hypothetical protein	LmjF29.2120	absent (no trace)	LbrM29_V2.2100
Hypothetical protein	LmjF29.2880	LinJ29.2570	LbrM29_V2.2910
Polynucleotide kinase 3’-phosphatase	LmjF30.0190	LinJ30_V3.0180	LbrM30_V2.0190
Hypothetical protein	LmjF30.1180	LinJ30_V3.1240	LbrM30_V2.1300
Hypothetical protein	LmjF30.1190	LinJ30_V3.1250	LbrM30_V2.1310							2.50599	0.000179263	Li ama
Hypothetical protein	LmjF30.1220	LinJ30_V3.1280	LbrM30_V2.1340
Epsilon-adaptin like gene	LmjF30.1545	LinJ30_V3.1560	LbrM30_V2.1600
Hypothetical protein	LmjF30.1985	LinJ30_V3.1980	LbrM30_V2.1930
Hypothetical protein	LmjF30.2010	LinJ30_V3.2010	LbrM30_V2.1960
Tyrosine/dopa decarboxylase	LmjF30.2500	LinJ30_V3.2490	LbrM30_V2.2460				1.96003	1.2817e-05	Lm ama
Phospholipase c-like protein	LmjF30.2950	LinJ30_V3.2970	LbrM30_V2.2930				2.1422	7.44479e-08	Lm ama
Hypothetical protein	LmjF31.0260	LinJ31_V3.0280	LbrM31_V2.0370
Triacyglycerol lipase	LmjF31.0830	LinJ31_V3.0860	LbrM31_V2.1010
Hypothetical protein	LmjF31.1040	LinJ31_V3.1040	LbrM31_V2.1240
n-acyl-I-amino acid amidohydrolase	LmjF31.1130	LinJ31_V3.1140	LbrM31_V2.1330				2.06282	1.33457e-06	Lm pro
Hypothetical protein	LmjF31.1165	LinJ31_V3.1180	LbrM31_V2.1370							2.23232	3.71263e-06	Li ama
Hypothetical protein	LmjF31.1330	LinJ31_V3.1350	degenerate				4.12048	4.1793e-10	Lm ama
Hypothetical protein	LmjF31.2195	LinJ31_V3.2260	degenerate
Hypothetical protein	LmjF31.2240	LinJ31.2680	absent (no trace)				2.02836	2.86014e-06	Lm ama
3’ nucleotidase/nuclease	LmjF31.2300	LinJ31_V3.2370	LbrM31_V2.2570	-0.891689	0.0272107	Ama	1.72079	0.000140944	Lm ama	1.99412	2.45926e-05	Li ama
Glutamamyl carboxypeptidase	LmjF31.2660	LinJ31_V3.2740	LbrM31_V2.3010
Glutamamyl carboxypeptidase	LmjF31.2785	LinJ31_V3.2880	LbrM31_V2.3140				1.89389	6.27071e-06	Lm ama
Hypothetical protein	LmjF31.3000	LinJ31.3720	LbrM31_V2.3370
Mu-adaptin 4	LmjF31.3035	LinJ31_V3.3150	LbrM31_V2.3420
Hypothetical protein	LmjF32.0280	LinJ32_V3.0290	LbrM32_V2.0350
MAP Kinase	LmjF32.0795	LinJ32_V3.0840	absent (no trace)
Hypothetical protein	LmjF32.0985	LinJ32.1390	LbrM32_V2.1080
Hypothetical protein	LmjF32.1540	LinJ32_V3.1620	LbrM32_V2.1710
helicase	LmjF32.1590	LinJ32_V3.1580	LbrM32_V2.1760
Hypothetical protein	LmjF32.1630	LinJ32_V3.1700	LbrM32_V2.1790
Hypothetical protein	LmjF32.1790	LinJ32_V3.1870	LbrM32_V2.1960
Hypothetical protein	LmjF32.1880	LinJ32_V3.1980	LbrM32_V2.2070
Hypothetical protein	LmjF32.1950	LinJ32_V3.2060	LbrM32_V2.2140
Hypothetical protein	LmjF32.2405	LinJ32.2915	degenerate	NOT ON ARRAY
Hypothetical protein	LmjF32.2998	LinJ32_V3.3180	LbrM32_V2.3280
Hypothetical protein	LmjF32.3410	LinJ32_V3.3610	LbrM32_V2.3710
Hypothetical protein	LmjF32.3420	LinJ32_V3.3620	degenerate
Hypothetical protein	LmjF32.3690	LinJ32_V3.3840	LbrM32_V2.3930
Hypothetical protein	LmjF33.0115	LinJ33_V3.0120	LbrM33_V2.0120
Hypothetical protein	LmjF33.0180	LinJ33_V3.0190	LbrM33_V2.0190	1.07722	0.0396854	Pro
Hypothetical protein	LmjF33.1000	LinJ33.1020	LbrM33_V2.1190
oxidoreductase	LmjF33.1770	LinJ33_V3.1870	LbrM33_V2.2030				2.09815	0.000217193	Lm pro
Hypothetical protein	LmjF33.2420	LinJ33_V3.2550	LbrM33_V2.2695
Hypothetical protein	LmjF33.2840	LinJ33_V3.2990	LbrM33_V2.3130
Hypothetical protein	LmjF33.2905	LinJ33_V3.3060	degenerate
Hypothetical protein	LmjF33.3060	LinJ33_V3.3220	LbrM33_V2.3340	NOT ON ARRAY
Hypothetical protein	LmjF33.3110	LinJ33_V3.3270	LbrM33_V2.3400
Hypothetical protein	LmjF34.0705	LinJ34_V3.0740	degenerate
aminophospholipid translocase	LmjF34.3220	LinJ34_V3.3000	LbrM20_V2.2800				1.7274	1.94207e-05	Lm ama
Hypothetical protein	LmjF34.3645	LinJ34_V3.3430	hits on Chr20							5.66388	4.3e-13	Li ama
Hypothetical protein	LmjF34.3952	LinJ34_V3.3770	LbrM20_V2.3570
Histone H4	LmjF35.0015	LinJ35.0020	LbrM34_V2.0020
Hypothetical protein	LmjF35.0450	LinJ35_V3.0440	LbrM34_V2.0470
Hypothetical protein	LmjF35.0480	LinJ35_V3.0470	LbrM34_V2.0500	1.84364	3.54682e-05	Pro
Hypothetical protein	LmjF35.0780	LinJ35_V3.0800	LbrM34_V2.0770
Hypothetical protein	LmjF35.0920	LinJ35_V3.0940	degenerate
Ribosomal protein L32 like protein	LmjF35.1960	LinJ35_V3.1950	LbrM34_V2.1870
Hypothetical protein	LmjF35.2725	LinJ35_V3.2770	LbrM34_V2.2620
Hypothetical protein	LmjF35.3580	LinJ35_V3.3630	LbrM34_V2.3540
Hypothetical protein	LmjF35.3650	LinJ35_V3.3700	LbrM34_V2.3620
Cysteine peptidase	LmjF35.3910	LinJ35_V3.3950	LbrM34_V2.3890
Hypothetical protein	LmjF35.4490	LinJ35_V3.4560	LbrM34_V2.4470				1.70626	0.000177526	Lm pro
Hypothetical protein	LmjF35.4730	LinJ35_V3.4800	LbrM34_V2.4700
L-ribulokinase	LmjF36.0060	LinJ36_V3.0060	LbrM35_V2.0100
Hypothetical protein	LmjF36.0325	LinJ36_V3.0350	LbrM35_V2.0410
Hypothetical protein	LmjF36.0580	LinJ36_V3.0630	LbrM35_V2.0700
Hypothetical protein	LmjF36.1395	LinJ36_V3.1450	LbrM35_V2.1530
Glyceraldehydes 3-phosphate dehydrogenase, cytosolic	LmjF36.2350	LinJ36.4900	LbrM30_V2.2950				3.56256	4.49451e-07	Lm ama
Trypanothione synthatase like protein	LmjF36.4300	LinJ36_V3.4510	degenerate
Hypothetical protein	LmjF36.4310	LinJ36_V3.4520	LbrM35_V2.4550
Hypothetical protein	LmjF36.4600	LinJ36_V3.4830	LbrM35_V2.4850
Beta adaptin	LmjF36.5595	LinJ36_V3.5840	LbrM35_V2.5870
Carboxypeptidase	LmjF36.6260	LinJ36_V3.6520	LbrM35_V2.6580
Hypothetical protein	LmjF36.6320	LinJ36_V3.6580	LbrM35_V2.6620
¬ Array data from this study;
* Array data from Rochette et al., 2008 [ref 14]
Blank Box with light blue highlight - genes constitutively expressed;
Text with green highlight - genes show regulated expression;
Red text indicates pseudogene annotation in GeneDB;
